# Supplementary material for: Correlation between Overconfidence and Learning Motivation in Postgraduate Infection Prevention and Control Training
Source: MDPI journal article supplement (doi:10.3390/ijerph19095763), 2022-05-09
Supplement: s1 [file s1]

## Supplementary Materials B

### Relevant items of the questionnaire for the present study

**Table S1.** Demographic items in the questionnaire in German and English

| German                                                                                                                                                                                                                   | English                                                                                                                                                               |
|--------------------------------------------------------------------------------------------------------------------------------------------------------------------------------------------------------------------------|-----------------------------------------------------------------------------------------------------------------------------------------------------------------------|
| Zuerst einige Fragen an Sie ...                                                                                                                                                                                          | Firstly, we have some questions for you...                                                                                                                            |
| <p>Welches Geschlecht haben Sie?</p> <p>-weiblich,<br/>-männlich<br/>-divers/transgender/transidentical<br/>-keine Angabe</p>                                                                                            | <p>Which gender are you?</p> <p>-female<br/>-male<br/>-diverse/transgender/transidentical<br/>-Not applicable</p>                                                     |
| <p>Wie alt Sie sind?</p> <p>-möchten Sie Ihr Alter nicht angeben,<br/>tragen Sie bitte "0" ein</p>                                                                                                                       | <p>How old are you?</p> <p>-If you do not want to disclose your<br/>age, you can enter "0"</p>                                                                        |
| <p>Wie alt fühlen Sie sich?</p> <p>-möchten Sie Ihr Alter nicht angeben,<br/>tragen Sie bitte "0" ein</p>                                                                                                                | <p>How old do you feel?</p> <p>-If you do not want to disclose your age,<br/>you can enter "0"</p>                                                                    |
| <p>Zu welcher Profession gehören Sie?</p> <p>-Gesundheits- und Krankenpflegekraft<br/>-Ärztin / Arzt<br/>-Rettungsdienstfachpersonal (RS,RA,<br/>NotSan)<br/>-Andere<br/>-keine Angabe</p>                               | <p>To which profession do you belong?</p> <p>-nurse<br/>-physician<br/>-paramedic<br/>-other<br/>-not applicable</p>                                                  |
| <p>Wie ist ihr Ausbildungsstand?</p> <p>-Ich bin Schülerin/Schüler oder<br/>Studierende/Studienrender<br/>-Ich habe meine Ausbildung<br/>abgeschlossen<br/>-Ich bin selbst Ausbilderin / Ausbilder<br/>-keine Angabe</p> | <p>What is your level of education?</p> <p>-Student/Trainee<br/>-I have completed my professional<br/>training<br/>-I am an instructor myself<br/>-not applicable</p> |

**Table S2.** The relevant Items for the present study in the questionnaire in German and English

| German                                                                                                                             | English                                                                                     |
|------------------------------------------------------------------------------------------------------------------------------------|---------------------------------------------------------------------------------------------|
| Wenn Sie an einer Schulung zur Händehygiene und Infektionsprävention teilnehmen, in wie weit treffen folgende Aussagen auf Sie zu? | When you think about hand hygiene training, to what extent does the following apply to you? |
| 1.Ich glaube diese Schulung ist für mich interessant                                                                               | I think that the training is interesting                                                    |
| 2.Ich mache diese Schulung zu meinem eigenen Nutzen                                                                                | I am doing this training for my own benefit                                                 |
| 3.Ich mache diese Schulung, weil ich es muss                                                                                       | I am doing this training because I have to                                                  |
| 4.Es mag gute Gründe geben, die Schulung zu machen, ich sehe für mich aber keine                                                   | There may be good reasons to do this training, but I don't see any for myself               |
| 5.Ich glaube eine solche Schulung ist angenehm                                                                                     | I think that this training is pleasant                                                      |
| 6.Ich denke eine solche Schulung ist gut für mich                                                                                  | I think that such a training is good for me                                                 |
| 7.Ich mache es, weil es etwas ist, was ich tun muss                                                                                | I do it because it is something that I have to do                                           |
| 8.Ich mache es, denke aber nicht, dass es die Zeit wert ist                                                                        | I do it but do not think that it is worth the time                                          |
| 9.Ich mache es, weil es Spaß macht                                                                                                 | I do it because it is fun                                                                   |
| 10.Ich nehme teil, weil es meine eigene Entscheidung ist                                                                           | I participate because it is my personal decision                                            |
| 11.Ich nehme teil weil ich keine andere Wahl habe                                                                                  | I participate because I don't have another choice                                           |
| 12.Ich weiß nicht, aber ich sehe nicht, was mir die Schulung bringen soll                                                          | I don't know; I don't see what this training brings me                                      |
| 13.Ich fühle mich gut, wenn ich die Schulung besuche                                                                               | I feel good when attending this training                                                    |
| 14.Ich glaube die Schulung ist wichtig für mich                                                                                    | I believe that this training is important for me                                            |
| 15.Ich fühle, dass ich an der Schulung teilnehmen muss                                                                             | I feel that I have to participate in this training                                          |
| 16.Ich nehme teil, bin mir aber unsicher, ob es gut es so etwas zu verfolgen                                                       | I participate, but I am unsure whether it is good to pursue it                              |
| 17.Fragen zur Selbsteinschätzung                                                                                                   | Questions on Self-assessment                                                                |
| 18.Ich führe die hygienische Händedesinfektion situationsgerecht durch.                                                            | I carry out hand hygiene if indicated in a situation                                        |
| 19.Ich erkenne die Indikationen für eine hygienische Händedesinfektion                                                             | I identify the indications for hand hygiene                                                 |
| 20.Ich wähle das benötigte Händedesinfektionsmittel situationsgerecht aus                                                          | I choose the appropriate disinfection agent for hand hygiene when indicated                 |

|                                                                                                                                                              |                                                                                                     |
|--------------------------------------------------------------------------------------------------------------------------------------------------------------|-----------------------------------------------------------------------------------------------------|
| 21. Ich erkenne Fehler in der Durchführung der hygienischen Händedesinfektion bei anderen Personen                                                           | I identify mistakes in the conduction of hand hygiene in other persons                              |
| 22. Ich greife korrigierend ein, wenn ich einen Fehler in der Durchführung der hygienischen Händedesinfektion bemerke                                        | I correct others readily, if I notice a mistake in hand hygiene                                     |
| 23. Ich nehme situationsgerecht Rückmeldungen an, wenn ich durch eine andere Person auf einen Fehler in der hygienischen Händedesinfektion hingewiesen werde | I accept feedback if others correct me for an error in hand hygiene if appropriate to the situation |
| 24. Meine Kollegen setzen die hygienische Händedesinfektion situationsgerecht um                                                                             | My colleagues carry out hand hygiene when indicated                                                 |
| 25. Meine Kollegen wissen die jeweiligen Indikationen für eine hygienische Händedesinfektion                                                                 | My colleagues know the indications for hand hygiene                                                 |
| 26. Meine Kollegen wählen das notwendige Desinfektionsmittel für eine hygienische Händedesinfektion korrekt aus                                              | My colleagues correctly choose the indicated disinfection agent                                     |
| 27. Meine Kollegen korrigieren mich situationsgerecht, wenn sie einen Fehler in meiner Händedesinfektion bemerken                                            | My colleagues correct me appropriately if they notice a mistake in my hand hygiene                  |
| 28. Meine Kollegen nehmen situationsgerecht Rückmeldungen und Hinweise an, wenn sie auf einen Hygienefehler angesprochen werden                              | My colleagues accept feedback according to the situation when they are corrected by others          |
| 29. Ärztinnen und Ärzte führen die hygienische Händedesinfektion situationsgerecht aus                                                                       | Physicians carry out hand hygiene when indicated                                                    |
| 30. Ärztinnen und Ärzte korrigieren mich situationsgerecht, wenn sie einen Fehler in meiner Händedesinfektion bemerken                                       | Physicians correct me appropriately, if they notice a mistake in my hand hygiene                    |
| 31. Ärztinnen und Ärzte nehmen situationsgerecht Rückmeldungen und Hinweise an, wenn sie auf einen Hygienefehler angesprochen werden                         | Physicians accept feedback according to the situation when they are corrected by others             |
| 32. Pflegekräfte führen die hygienische Händedesinfektion situationsgerecht aus                                                                              | Nurses carry out hand hygiene when indicated                                                        |
| 33. Pflegekräfte korrigieren mich situationsgerecht, wenn sie einen Fehler in meiner Händedesinfektion bemerken                                              | Nurses correct me appropriately, if they notice a mistake in my hand hygiene                        |

|                                                                                                                                                                                                                                                                                                                         |                                                                                                                                                                                                                                                                             |
|-------------------------------------------------------------------------------------------------------------------------------------------------------------------------------------------------------------------------------------------------------------------------------------------------------------------------|-----------------------------------------------------------------------------------------------------------------------------------------------------------------------------------------------------------------------------------------------------------------------------|
| 34. Pflegekräfte nehmen situationsgerecht Rückmeldungen und Hinweise an, wenn sie auf einen Hygienefehler angesprochen werden                                                                                                                                                                                           | Nurses accept feedback according to the situation when they are corrected by others                                                                                                                                                                                         |
| 35. Angehörige des Rettungsdienstes führen die hygienische Händedesinfektion situationsgerecht aus                                                                                                                                                                                                                      | Paramedics carry out hand hygiene when indicated                                                                                                                                                                                                                            |
| 36. Angehörige des Rettungsdienstes korrigieren mich situationsgerecht, wenn sie einen Fehler in meiner Händedesinfektion bemerken                                                                                                                                                                                      | Paramedics correct me appropriately, if they notice a mistake in my hand hygiene                                                                                                                                                                                            |
| 37. Angehörige des Rettungsdienstes nehmen situationsgerecht Rückmeldungen und Hinweise an, wenn sie auf einen Hygienefehler angesprochen werden                                                                                                                                                                        | Paramedics accept feedback according to the situation when they are corrected by others                                                                                                                                                                                     |
| Alle Items (1-37) waren auf 5 Likert Skala 1=trifft nicht zu bis 5=trifft voll zu                                                                                                                                                                                                                                       | All Items (1-37) were scaled on 5 Likert Scale 1=do not agree till 5=totally agree                                                                                                                                                                                          |
| Der glaubwürdig maximale Schaden einer unterlassenen Händedesinfektion ist<br>Unbedeutend (1)<br>gering - aber keine nachhaltigen Schäden (2)<br>Spürbar- mit verlängertem Aufenthalt im Krankenhaus (3)<br>Kritisch - mit bleibenden körperlichen Schäden (4)<br>Katastrophal - mit Todesfolge (5)                     | The credible maximum damage of omitted hand hygiene is insignificant (1), minor-without lasting effects (2), noticable- with a prolonged hospital stay (3), critical -with lasting physical damages (4), catastrophic- lethal (5)                                           |
| Wie häufig kommt es vor, dass ein Patient den geschätzten Schaden durch eine ausgebliebene Händedesinfektion erleidet?<br>seltener als einmal in 3 Jahren (1),<br>häufiger als. einmal in 3 Jahren (2),<br>häufiger als einmal pro Jahr (3)<br>häufiger als einmal pro 3 Monate (4)<br>häufiger als einmal pro Monat(5) | How often does it occur that a patient incurs the estimated potential damage of omitted hand hygiene?<br>Uncommon (1x >3 years) (1),<br>seldom (once every 3 years) (2),<br>moderate (once a year)(3),<br>often (once every 3 months) (4),<br>very often (once a month) (5) |
| In folgenden Situationen setze ich die hygienische Händedesinfektion um<br>Immer(>99%), Häufig (75-99%),<br>Mittelmäßig (25-75%), Selten (1-25%),<br>Niemals (< 1%)                                                                                                                                                     | I carry out hand hygiene in the following situations always (99%)(1), often (75–99%) (2), sometimes (25–75%) (3), seldomly (1-25%) (4), never (5)                                                                                                                           |
| Vor der Verbindung einer Infusionsleitung an eine periphere Venenverweilkanüle(WHO-2)                                                                                                                                                                                                                                   | Before connecting an infusion to an IV line (WHO-2)                                                                                                                                                                                                                         |

|                                                                                      |                                                                             |
|--------------------------------------------------------------------------------------|-----------------------------------------------------------------------------|
| Nach dem Aufheben eines heruntergefallenen Handtuchs eines Patienten im Bad (WHO-5)  | After picking up a patient's used towel in the bathroom (WHO-5)             |
| Vor dem Betreten eines Patientenzimmers bei einer Visite (no clear indication)       | Before entering a patient's room during rounds (no clear indication)        |
| Nach versehentlicher Kontamination der eigenen Hand mit Urin eines Patienten(WHO-3)  | After accidental contamination of the own hand with patient's urine (WHO-3) |
| Nach dem Vorbereiten eines Medikaments(no indication)                                | After preparing sterile IV medication (no indication)                       |
| Nach dem Abstellen eines benutzten Patientenbettes in einen Untersuchungsraum(WHO-5) | After parking a used patient's bed in an examination room(WHO-5)            |
| Vor der Begrüßung eines Patienten mit Handschlag(WHO-1)                              | Before greeting a patient with a handshake (WHO-1)                          |
| Nach dem Aufhelfen eines gestürzten Patienten(WHO-4)                                 | After helping a patient stand up who has fallen(WHO-4)                      |
| Nach der Verabschiedung eines Patienten mit Handschlag(WHO-4)                        | After saying goodbye to a patient with a handshake(WHO-4)                   |
| Nach dem Essen in der Mittagspause (no clear indication)                             | After eating lunch in the canteen (no clear indication)                     |
| Vor dem Umstecken eines neuen Urin-Beutels an einen Harnblasendauerkatheter(WHO-2)   | Before connecting a urinary catheter to a collection bag (WHO 2)            |
| Vor dem Lagern eines Patienten im Bett oder auf einem OP-Tisch(WHO-1)                | Before positioning a patient in their bed or on the operating table (WHO-1) |
