# Supplementary material for: Correlation between Overconfidence and Learning Motivation in Postgraduate Infection Prevention and Control Training
Source: MDPI journal article supplement (doi:10.3390/ijerph19095763), 2022-05-09
Supplement: s1 [file s1]

# Supplementary materials A

Table S1  
*Curvilinear regression analysis of intrinsic motivation as criterion and overplacement as a predictor variable*

|                                            | B    | R <sup>2</sup> | BCa 95% Lower | BCa 95% Upper |
|--------------------------------------------|------|----------------|---------------|---------------|
| Constant                                   | 3.15 |                | 2.95          | 3.36          |
| Overplacement                              | .10  | .02            | -.06          | .28           |
| Overplacement <sup>2</sup> -quadratic term | -.03 | .02            | -0.20         | .21           |

*Note.* Dependent variable is intrinsic motivation, B-unstandardised regression coefficient; R<sup>2</sup>-a proportion of the variance of the dependent variable explained by an independent variable; BCa 95% Lower and BCa 95% Upper-the borders of the 95% confidence interval after bootstrapping (Bias corrected and accelerated method) based on 1000 samples.

Table S2  
*Curvilinear regression analysis of identified regulation as criterion and overplacement as predictor variable*

|                                            | B    | R <sup>2</sup> | BCa 95% Lower | BCa 95% Upper |
|--------------------------------------------|------|----------------|---------------|---------------|
| Constant                                   | 3.79 |                | 3.56          | 4.01          |
| Overplacement                              | .11  | .01            | -.08          | .32           |
| Overplacement <sup>2</sup> -quadratic term | -.10 | .06            | -.27          | .17           |

*Note.* Dependent variable is identified regulation, B-unstandardised regression coefficient; R<sup>2</sup>-the proportion of the variance of the dependent variable explained by an independent variable; BCa 95% lower and BCa 95% Upper-the borders of the 95% confidence interval after bootstrapping (Bias corrected and accelerated method) based on 1000 samples.

Table S3  
*Curvilinear regression analysis of external regulation as a criterion and overplacement as a predictor variable*

|  | B | R <sup>2</sup> | BCa 95% Lower | BCa 95% Upper |
|--|---|----------------|---------------|---------------|
|--|---|----------------|---------------|---------------|

|                                                |      |     |      |      |
|------------------------------------------------|------|-----|------|------|
| Constant                                       | 2,93 |     | 2.67 | 3.12 |
| Overplacement                                  | .04  | .01 | -.10 | .20  |
| Overplacement <sup>2</sup> -<br>quadratic term | -.04 | .04 | -.21 | .10  |

*Note.* Dependent variable is external regulation; B-unstandardised regression coefficient; R<sup>2</sup>-the proportion of the variance of the dependent variable explained by an independent variable; BCa 95% lower and BCa 95% Upper-the borders of the 95% confidence interval after bootstrapping (Bias corrected and accelerated method) based on 1000 samples.

Table S4

*Curvilinear regression analysis of amotivation as criterion and overplacement as predictor variable*

|                                                | B     | R <sup>2</sup> | BCa 95%<br>Lower | BCa 95%<br>Upper |
|------------------------------------------------|-------|----------------|------------------|------------------|
| Constant                                       | 1.69  |                | 1.38             | 1.82             |
| Overplacement                                  | -.07  |                | -.28             | .10              |
| Overplacement <sup>2</sup> -<br>quadratic term | .16 * | .95            | .01              | .26              |

*Note.* Dependent variable is amotivation; B-unstandardised regression coefficient; R<sup>2</sup>-the proportion of the variance of the dependent variable explained by an independent variable; BCa 95% lower and BCa 95% Upper-the borders of the 95% confidence interval after bootstrapping (Bias corrected and accelerated method) based on 1000 samples. \* -is significant on the p<0,05 level; \*\*- is significant at the p<0,01 level.

Table S5

*Curvilinear regression analysis of intrinsic motivation as criterion and clinical tribalism (nurses' self-assessment vs.nurses' perception of physicians' competencies) as predictor variable*

|                                                     | B    | R <sup>2</sup> | BCa 95%<br>Lower | BCa 95%<br>Upper |
|-----------------------------------------------------|------|----------------|------------------|------------------|
| Constant                                            | 3.19 |                | 2.74             | 3.76             |
| Clinical tribalism<br>nurses vs.<br>physicians      | .31  | .17            | -0.02            | .43              |
| Clinical tribalism <sup>2</sup> -<br>quadratic term | -.50 | .34            | -1.08            | .20              |

nurses vs.  
physicians

Note. Dependent variable is intrinsic motivation; nurses vs. physicians- difference between nurses' self-assessment  
And nurses' perception of physicians' competencies; B-unstandardised regression coefficient; R<sup>2</sup>-a proportion of the variance  
of the dependent variable explained by the independent variables; BCa 95% lower and BCa 95% Upper-the borders  
of the 95% confidence interval after bootstrapping (Bias corrected and accelerated Method) based on 1000  
samples. \* -is significant on the p<0,05 level; \*\* - is significant on the p<0,01 level.

Table S6  
*Curvilinear regression analysis of identified regulation as criterion variable and  
Clinical tribalism (nurses' self-assessment vs.nurses' perception of physicians' competencies)  
as predictor variable*

|                                                                                   | B    | R <sup>2</sup> | BCa 95%<br>Lower | BCa 95%<br>Upper |
|-----------------------------------------------------------------------------------|------|----------------|------------------|------------------|
| Constant                                                                          | 3.65 |                | 3.28             | 4.07             |
| Clinical tribalism<br>(nurses vs.<br>physicians)                                  | .37  | .09            | -.05             | .67              |
| Clinical tribalism<br>(nurses vs.<br>physicians) <sup>2</sup> -<br>quadratic term | -.43 | .16            | -.83             | 0.08             |

Note. Dependent variable is identified regulation; nurses vs. physicians- difference between nurses'  
self-assessment and nurses' perception of physicians' competencies; B-unstandardised regression coefficient;  
R<sup>2</sup>-a proportion of the variance of the dependent variable explained by the independent variables;  
BCa 95% lower and BCa 95% Upper-the borders of the 95% confidence interval after bootstrapping  
(Bias corrected and accelerated Method) based on 1000 samples. \* -is significant at the p<0,05 level;  
\*\*- is significant at the p<0,01 level.

Table S7  
*Curvilinear regression analysis of external regulation as criterion variable and  
Clinical tribalism (nurses' self-assessment vs.nurses' perception of physicians' competencies)  
as predictor variable*

|                                                                                 | B    | R <sup>2</sup> | BCa 95%<br>Lower | BCa 95%<br>Upper |
|---------------------------------------------------------------------------------|------|----------------|------------------|------------------|
| Constant                                                                        | 3.21 |                | 2.63             | 5.26             |
| Clinical<br>tribalism(nurses<br>vs.physicians)                                  | -.04 | .08            | -.31             | .05              |
| Clinical<br>tribalism(nurses<br>vs.physicians) <sup>2</sup> -<br>quadratic term | -.02 | .09            | -.16             | .50              |

Note. Dependent variable is external regulation; nurses vs. physicians- difference between nurses' self-assessment  
and nurses' perception of physicians' competencies; B-unstandardised regression coefficient; R<sup>2</sup>-a proportion of the

variance of the dependent variable explained by the independent variables; BCa 95% lower and BCa 95% Upper-the borders of the 95% confidence interval after bootstrapping (Bias corrected and accelerated Method) based on 1000 samples. \* -is significant on the p<0,05 level; \*\*- is significant at the p<0,01 level.

Table S8  
*Curvilinear regression analysis of amotivation as criterion and Clinical tribalism (nurses' self-assessment-nurses' perception of physicians' competencies) as predictor variable*

|                                                                        | B      | R <sup>2</sup> | BCa 95%<br>Lower | BCa 95%<br>Upper |
|------------------------------------------------------------------------|--------|----------------|------------------|------------------|
| Constant                                                               | 1.77   |                | 1.03             | 2.10             |
| Clinical tribalism(nurses vs.physicians)                               | -.49** | .01            | -.60             | .38              |
| Clinical tribalism(nurses vs.physicians) <sup>2</sup> - quadratic term | .13**  | .13            | .007             | .20              |

*Note.* Dependent variable is amotivation; nurses vs. physicians- difference between nurses' self-assessment and nurses' perception of physicians' competencies)B-unstandardised regression coefficient; R<sup>2</sup>-a proportion of the variance of the dependent variable explained by the independent variables; BCa 95% lower and BCa 95% Upper-the borders of the 95% confidence interval after bootstrapping (Bias corrected and accelerated Method) based on 1000 samples. \* -is significant on the p<0,05 level; \*\*- is significant at the p<0,01 level.

Table S9  
*Curvilinear regression analysis of intrinsic motivation as criterion and Clinical tribalism (nurses' self-assessment-nurses' perception of paramedics' competencies) as predictor variable*

|                                                                        | B    | R <sup>2</sup> | BCa 95%<br>Lower | BCa 95%<br>Upper |
|------------------------------------------------------------------------|------|----------------|------------------|------------------|
| Constant                                                               | 3.19 |                | 2.71             | 3.77             |
| Clinical tribalism(nurses vs.paramedics)                               | .31  | .02            | -.11             | .46              |
| Clinical tribalism(nurses vs.paramedics) <sup>2</sup> - quadratic term | -.11 | .11            | -.23             | .06              |

*Note.* Dependent variable is intrinsic motivation B-unstandardised regression coefficient; Clinical tribalism (nurses vs. paramedics)- difference between nurses' self-assessment and nurses' perception of paramedics' competencies); R<sup>2</sup>-the proportion of the variance for a dependent variable explained by an independent variable; BCa 95% lower and BCa 95% Upper-the borders of the 95% confidence interval after bootstrapping (Bias corrected and accelerated Method) based on 1000 samples. \* -is significant at the p<0,05 level; \*\*- is significant at the p<0,01 level.

Table S10  
*Curvilinear regression analysis of identified motivation criterion and*

*Clinical tribalism (nurses' self-assessment-nurses' perception of paramedics' competencies)  
as predictor variable*

|                                                                                 | B    | R <sup>2</sup> | BCa 95%<br>Lower | BCa 95%<br>Upper |
|---------------------------------------------------------------------------------|------|----------------|------------------|------------------|
| Constant                                                                        | 3.63 |                | 2.46             | 4.64             |
| Clinical<br>tribalism(nurses<br>vs.paramedics)                                  | .19  | .002           | -1.03            | 1.24             |
| Clinical<br>tribalism(nurses<br>vs.paramedics) <sup>2</sup> -<br>quadratic term | -.03 | .008           | -.35             | .39              |

*Note.* Dependent variable is identified regulation; B-unstandardised regression coefficient; Clinical tribalism (nurses vs. paramedics)-nurses' self-assessment-nurses' perception of paramedics' competencies; R<sup>2</sup>-the proportion of the variance for a dependent variable explained by an independent variable; BCa 95% lower and BCa 95% Upper-the borders of the 95% confidence interval after bootstrapping (Bias corrected and accelerated Method) based on 1000 samples. \* -is significant at the p<0,05 level; \*\* - is significant at the p<0,01 level.

Table S11

*Curvilinear regression analysis of external motivation as the criterion and  
Clinical tribalism (nurses' self-assessment-nurses' perception of paramedics' competencies)  
as predictor variable*

|                                                                          | B    | R <sup>2</sup> | BCa 95%<br>Lower | BCa 95% Upper |
|--------------------------------------------------------------------------|------|----------------|------------------|---------------|
| Constant                                                                 | 3.74 |                | 2.91             | 4.65          |
| Clinical tribalism(nurses<br>vs.paramedics)                              | -.58 | .001           | -1.90            | .88           |
| Clinical tribalism(nurses<br>vs.paramedics) <sup>2</sup> -quadratic term | .95  | .05            | -.25             | .34           |

*Note.* Dependent variable is external motivation B-unstandardised regression coefficient; R<sup>2</sup>-the proportion of the variance for a dependent variable explained by an independent variable; BCa 95% lower and BCa 95% Upper-the borders of the 95% confidence interval after bootstrapping (Bias corrected and accelerated Method) based on 1000 samples. \* -is significant at the p<0,05 level; \*\* - is significant at the p<0,01 level.

Table S12

*Curvilinear regression analysis of amotivation as the criterion variable and Clinical tribalism  
(nurses' self-assessment-nurses' perception of paramedics' competencies)  
as predictor variable*

|                                                                          | B    | R <sup>2</sup> | BCa 95%<br>Lower | BCa 95%<br>Upper |
|--------------------------------------------------------------------------|------|----------------|------------------|------------------|
| Constant                                                                 | 1.07 |                | .40              | 1.73             |
| Clinical tribalism(nurses<br>vs.paramedics)                              | .61  | .002           | -.61             | 2.01             |
| Clinical tribalism(nurses<br>vs.paramedics) <sup>2</sup> -quadratic term | -.14 | .03            | -.47             | .12              |

*Note.* Dependent variable is amotivation B-unstandardised regression coefficient; R<sup>2</sup>-the proportion

of the variance for a dependent variable explained by an independent variable; BCa 95% lower and BCa 95% Upper-the borders of the 95% confidence interval after bootstrapping (Bias corrected and accelerated Method) based on 1000 samples. \*-is significant at the  $p<0,05$  level; \*\*- is significant at the  $p<0,01$  level

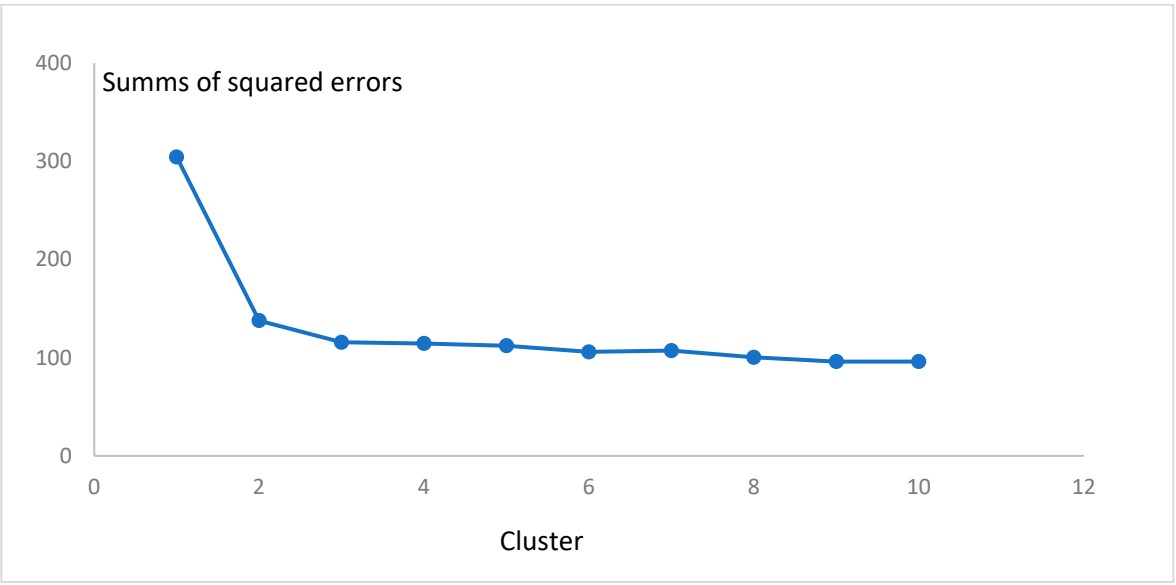

**Figure S1.** Plot of sums of squared errors against the number of clusters

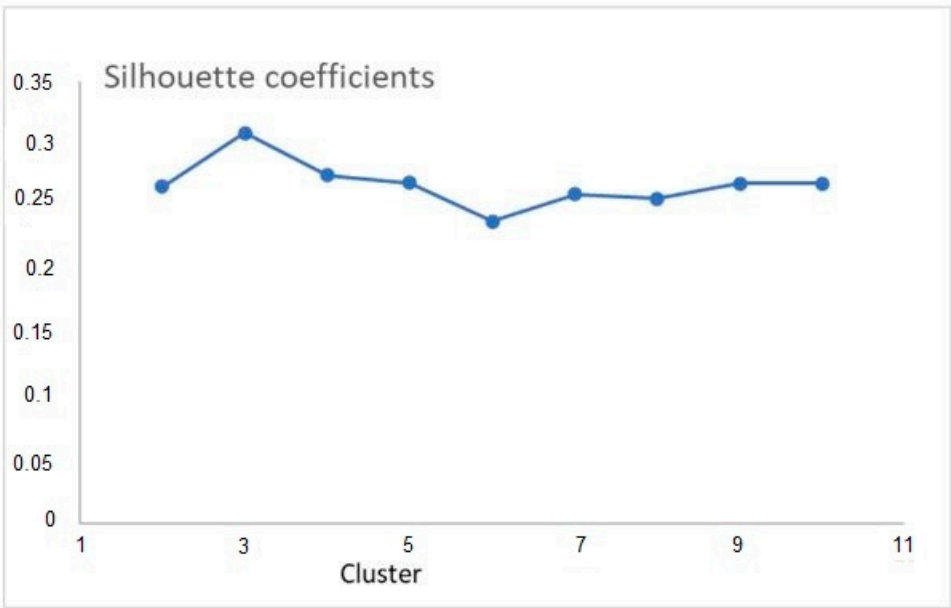

Figure S2. Plot of the means of the Silhouette values against the number of clusters

Table S13  
*Power analysis for F tests - ANOVA: Fixed effects, omnibus, one-way for the large effect size*

|        | Parameter                         | Value     |
|--------|-----------------------------------|-----------|
| Input  | Effect size f                     | 0.4       |
|        | $\alpha$ err prob                 | 0.05      |
|        | Power (1- $\beta$ err prob)       | 0.80      |
|        | Number of groups                  | 3         |
| Output | Noncentrality parameter $\lambda$ | 10.560000 |
|        | Critical F                        | 3.1428085 |
|        | Numerator df                      | 2         |

|                   |           |
|-------------------|-----------|
| Denominator df    | 63        |
| Total sample size | 66        |
| Actual power      | 0.8180744 |

Note. Input-previous specified parameter; Output-calculated parameter ;ANOVA-Analysis of Varince

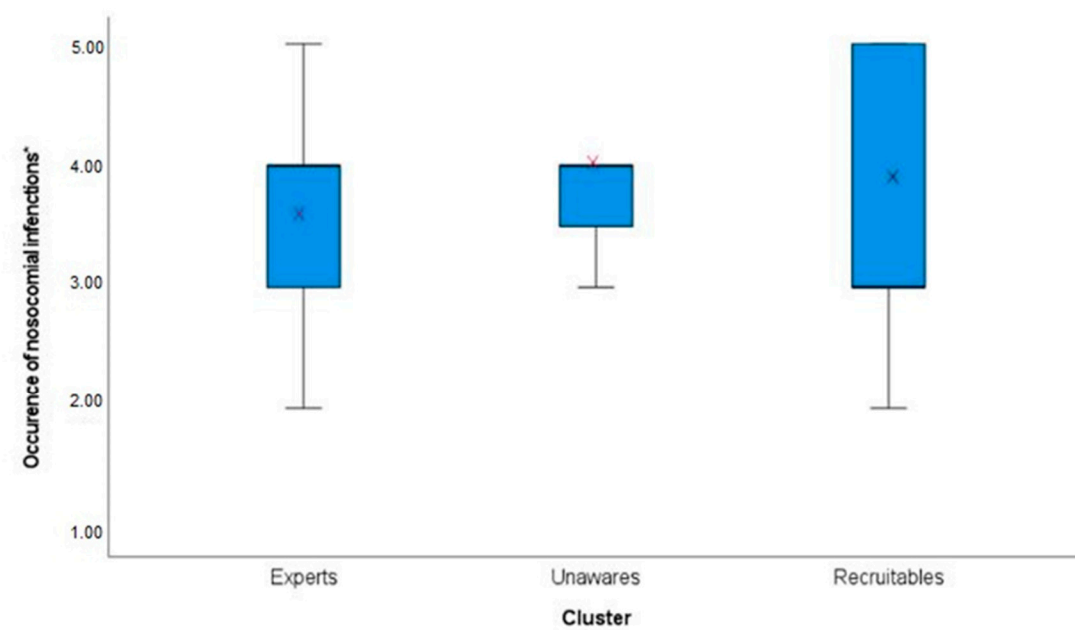

**Figure S3. Comparison between the clusters with regards to the mean values of the variable related to patients’ Safety (Occurrence of nosocomial infections)**

*Note.* Occurrence of nosocomial infections \*- The Item belongs to patients’ safety according to international standards of ISO 31000 of medical failure mode effect analysis (FMEA): “How often is it that a patient gets harmed in your working environment? Uncommon (1x >3 years) (1), seldom (once per 3 years) (2), moderate (once per year) (3), often (once per 3 months) (4), very often (once per month) (5)”. X-the mean value of the variable in the cluster; One-way ANOVA determined no statistically significant difference between groups.

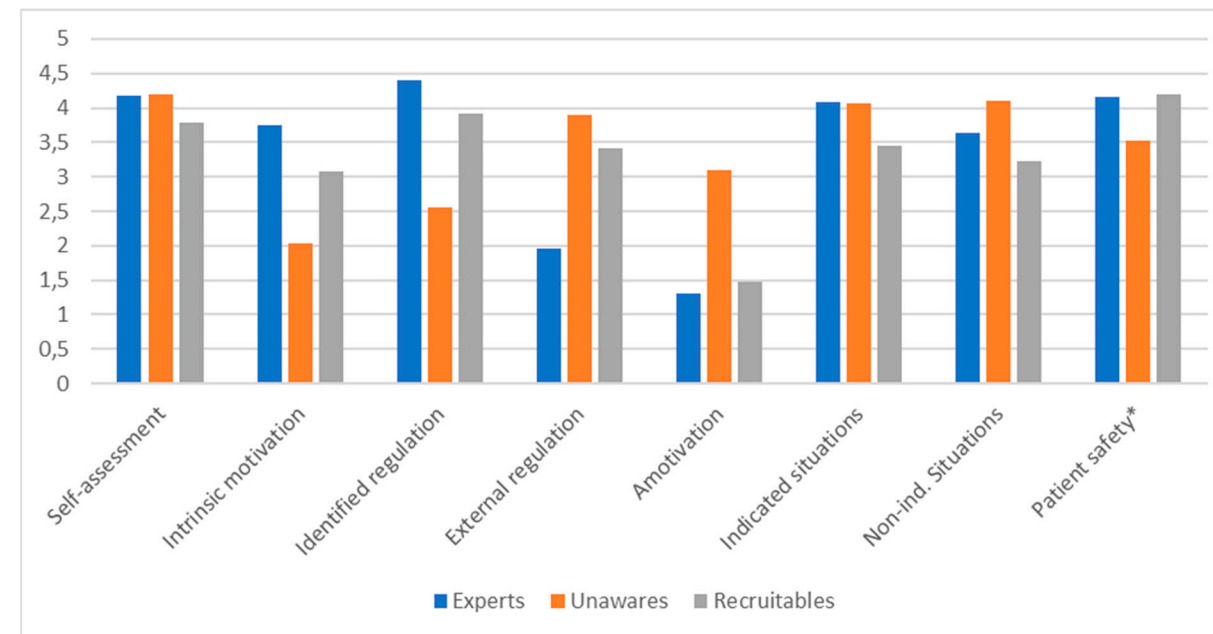

**Figure S4. Comparison of the clusters with regards to the mean values of the variables**

*Note.* Patient safety\* is the item “The credible maximum effect of omitted hand hygiene is without consequence (1), minor-without any long-lasting effect (2), severe- with longer hospital stay (3), critical -with long-lasting effect (4) and lethal (5) “.
